# Supplementary material for: The genetic heterogeneity and mutational burden of engineered melanomas in zebrafish models
Source: PubMed Central journal article supplement (PMC3983654; doi:10.1186/gb-2013-14-10-r113), 2013-10-23

Figure S1

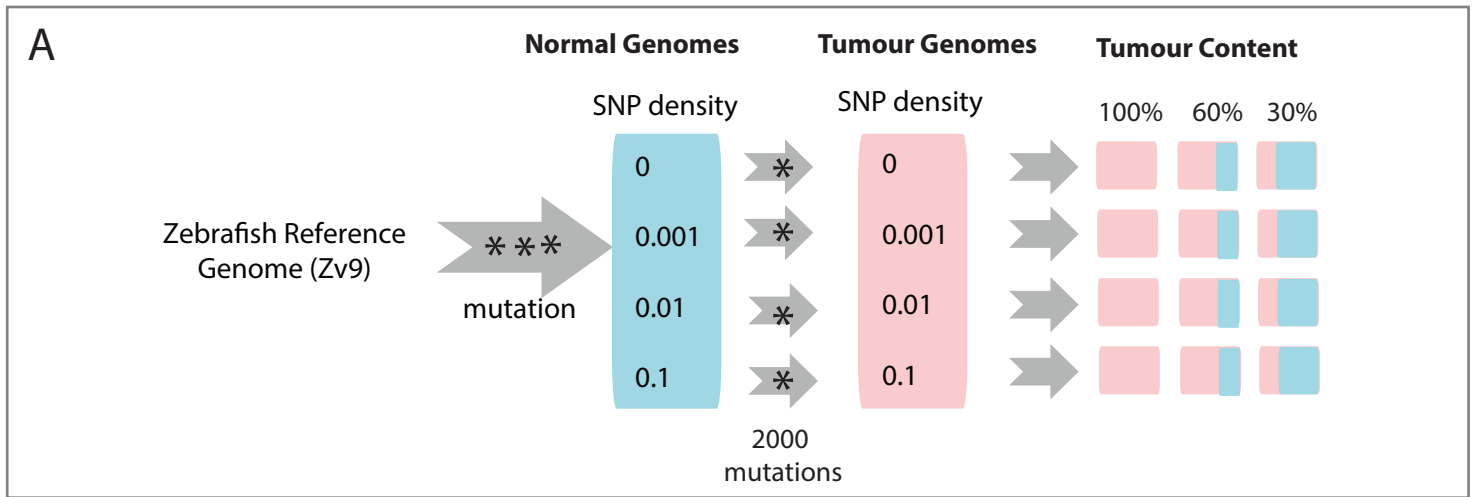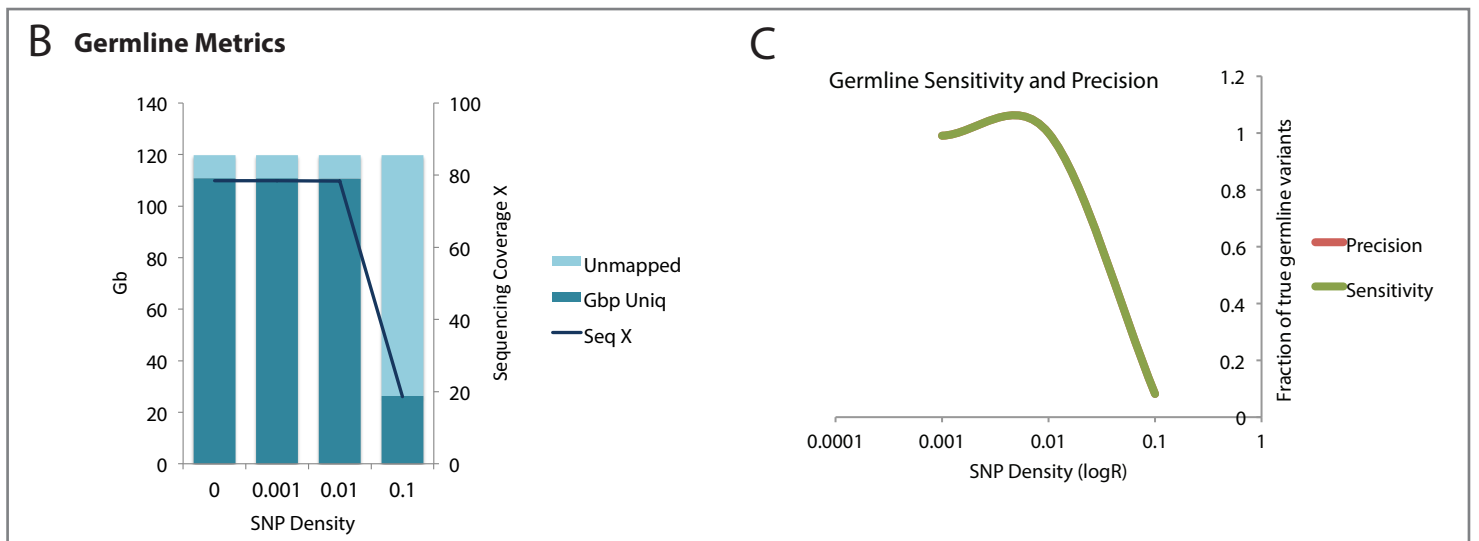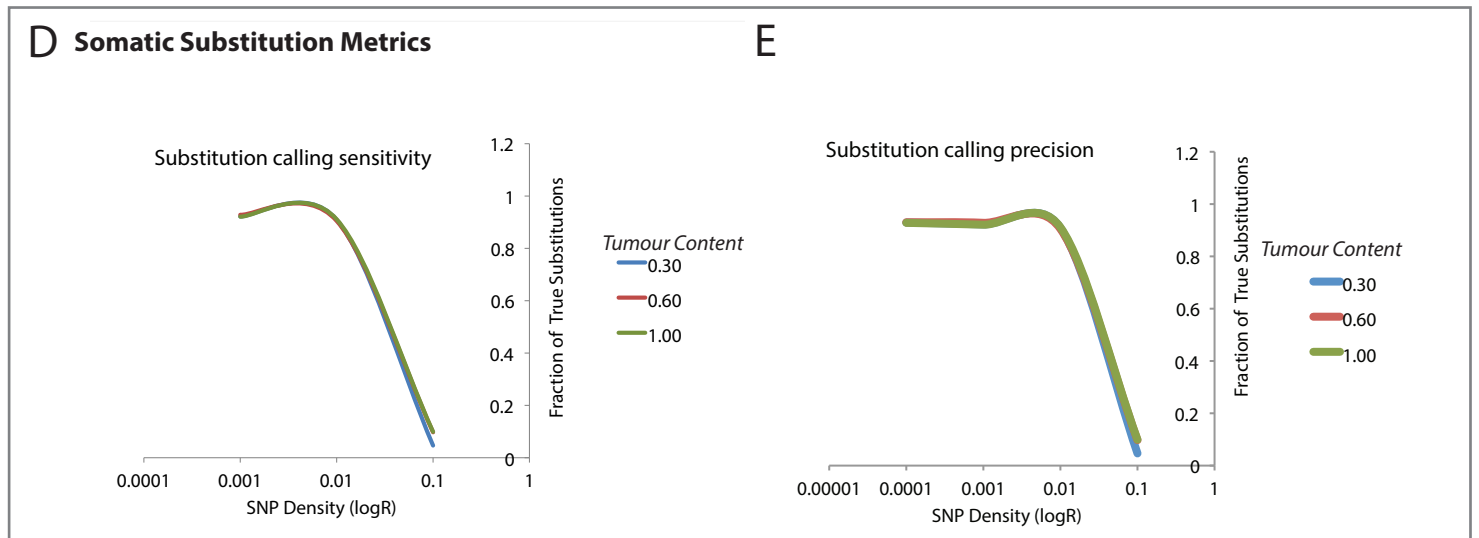

Figure S2

A. Breakdown of all CaVEMAN variants

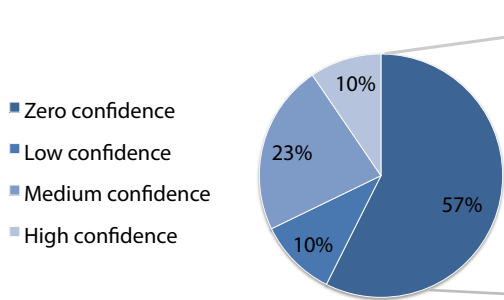

B. Breakdown of False Positives

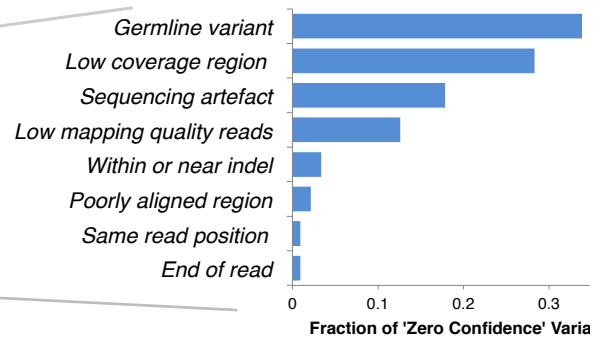

Comparison of callers for ZD8a

C. Breakdown of CaVEMAN variants

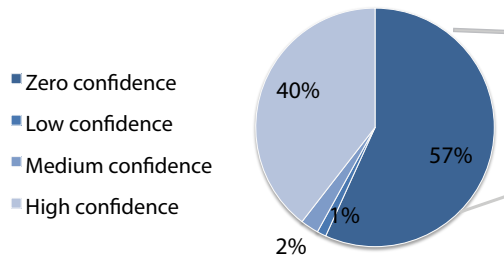

Variant Overlap

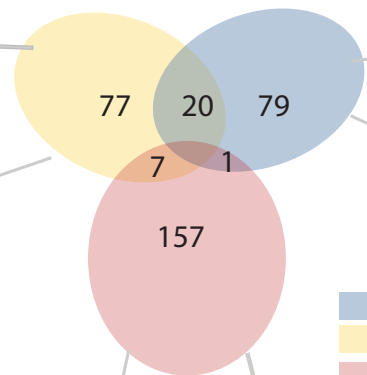

D. Breakdown of Sniper variants

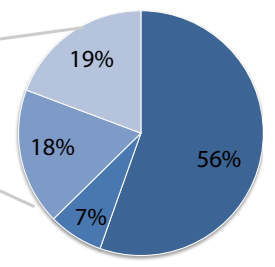

Legend for Variant Overlap:  
 Somatic Sniper (light blue)  
 CaVEMAN (yellow)  
 SGA (pink)

E. Breakdown of SGA variants

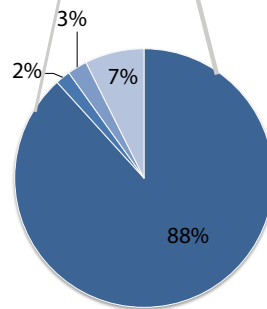

Figure S3

### A Filtered calls for Melanoma Dataset

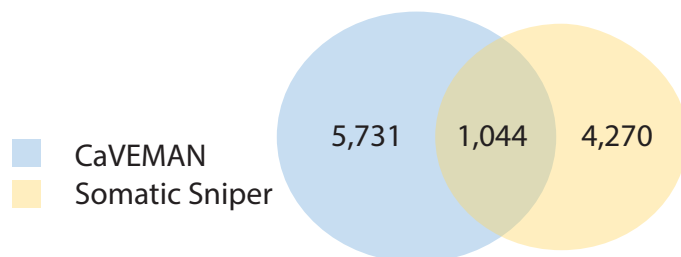

### B Processing Flow Chart

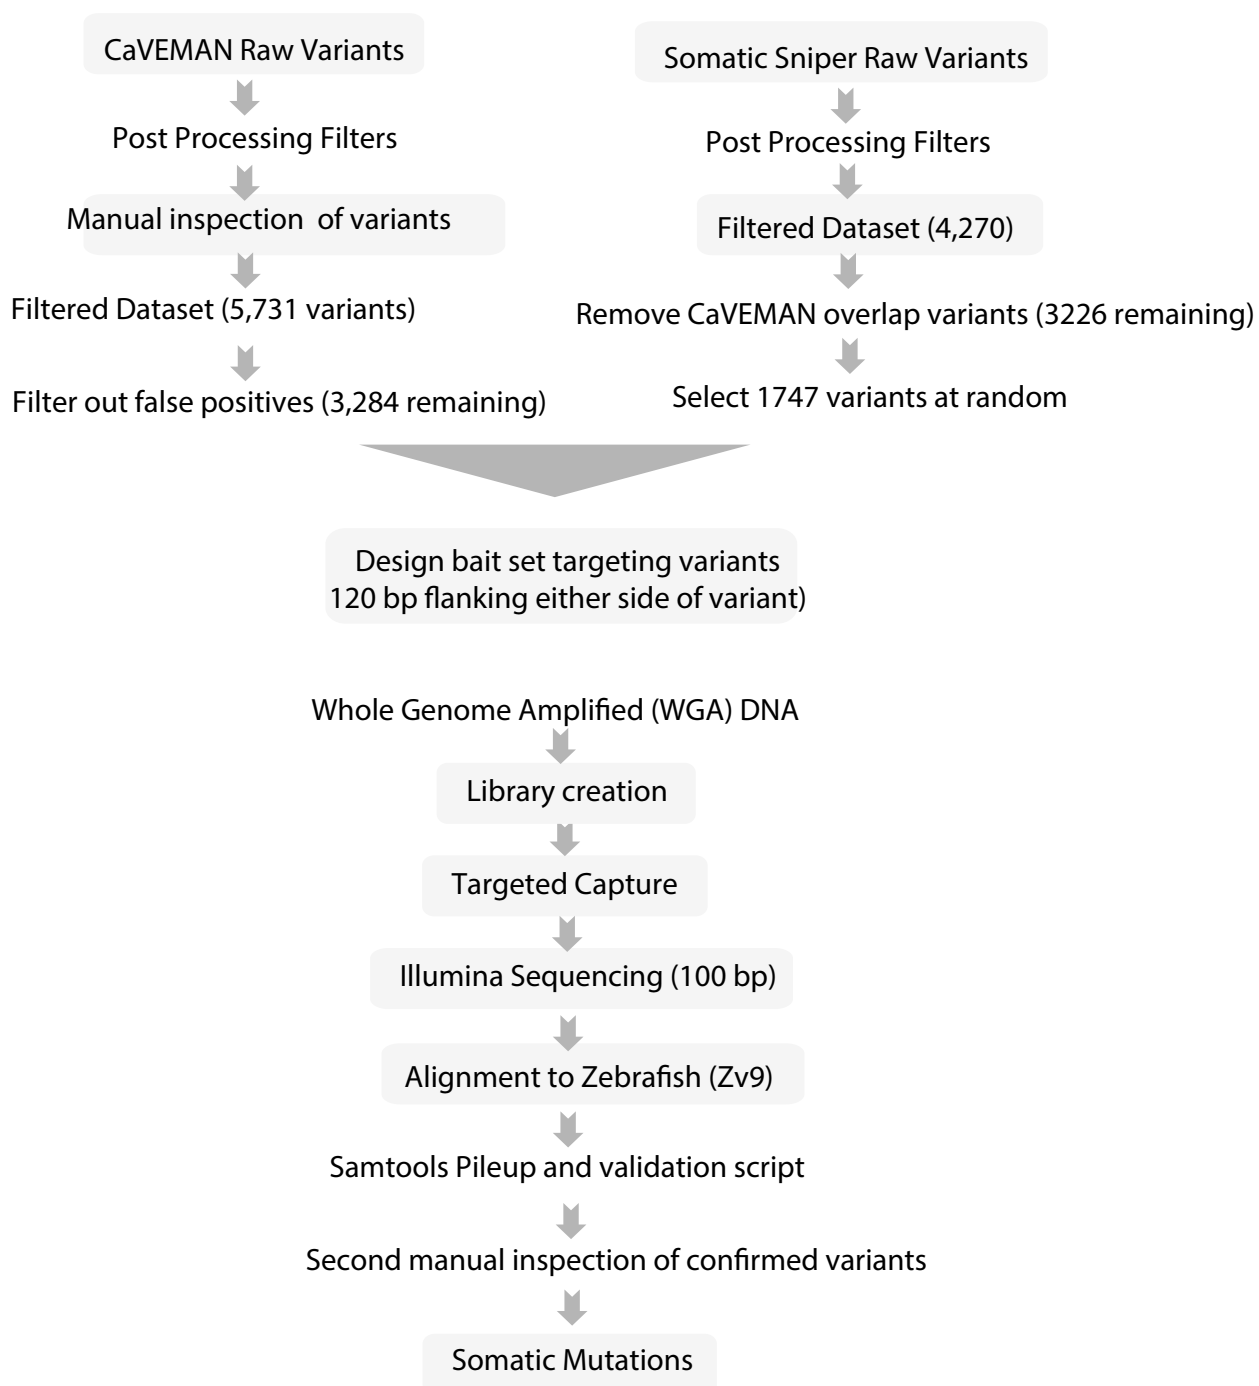

Figure S4

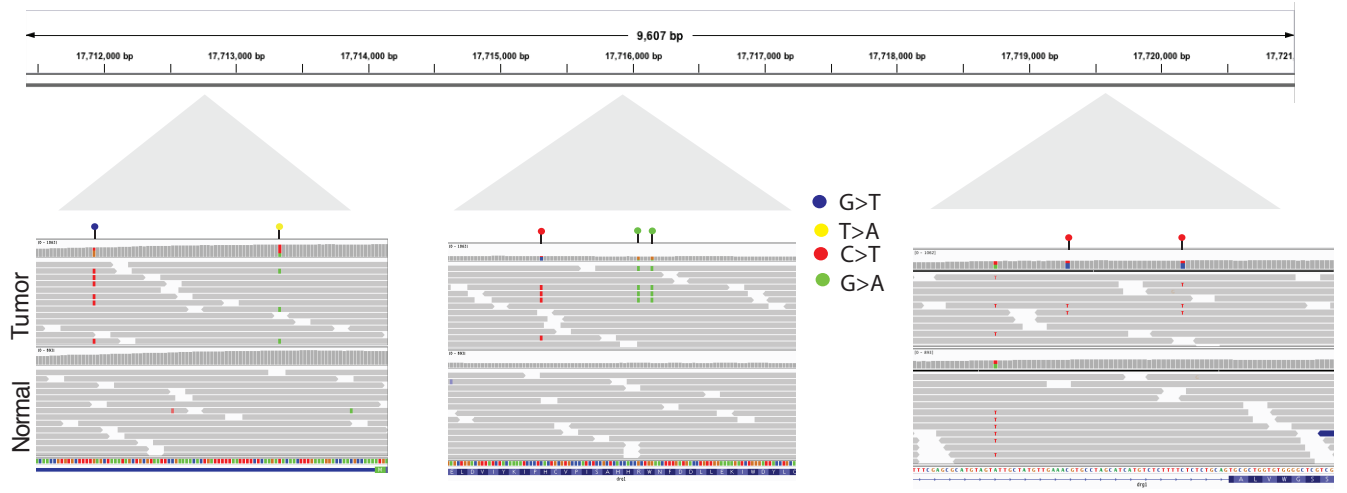

Figure S5

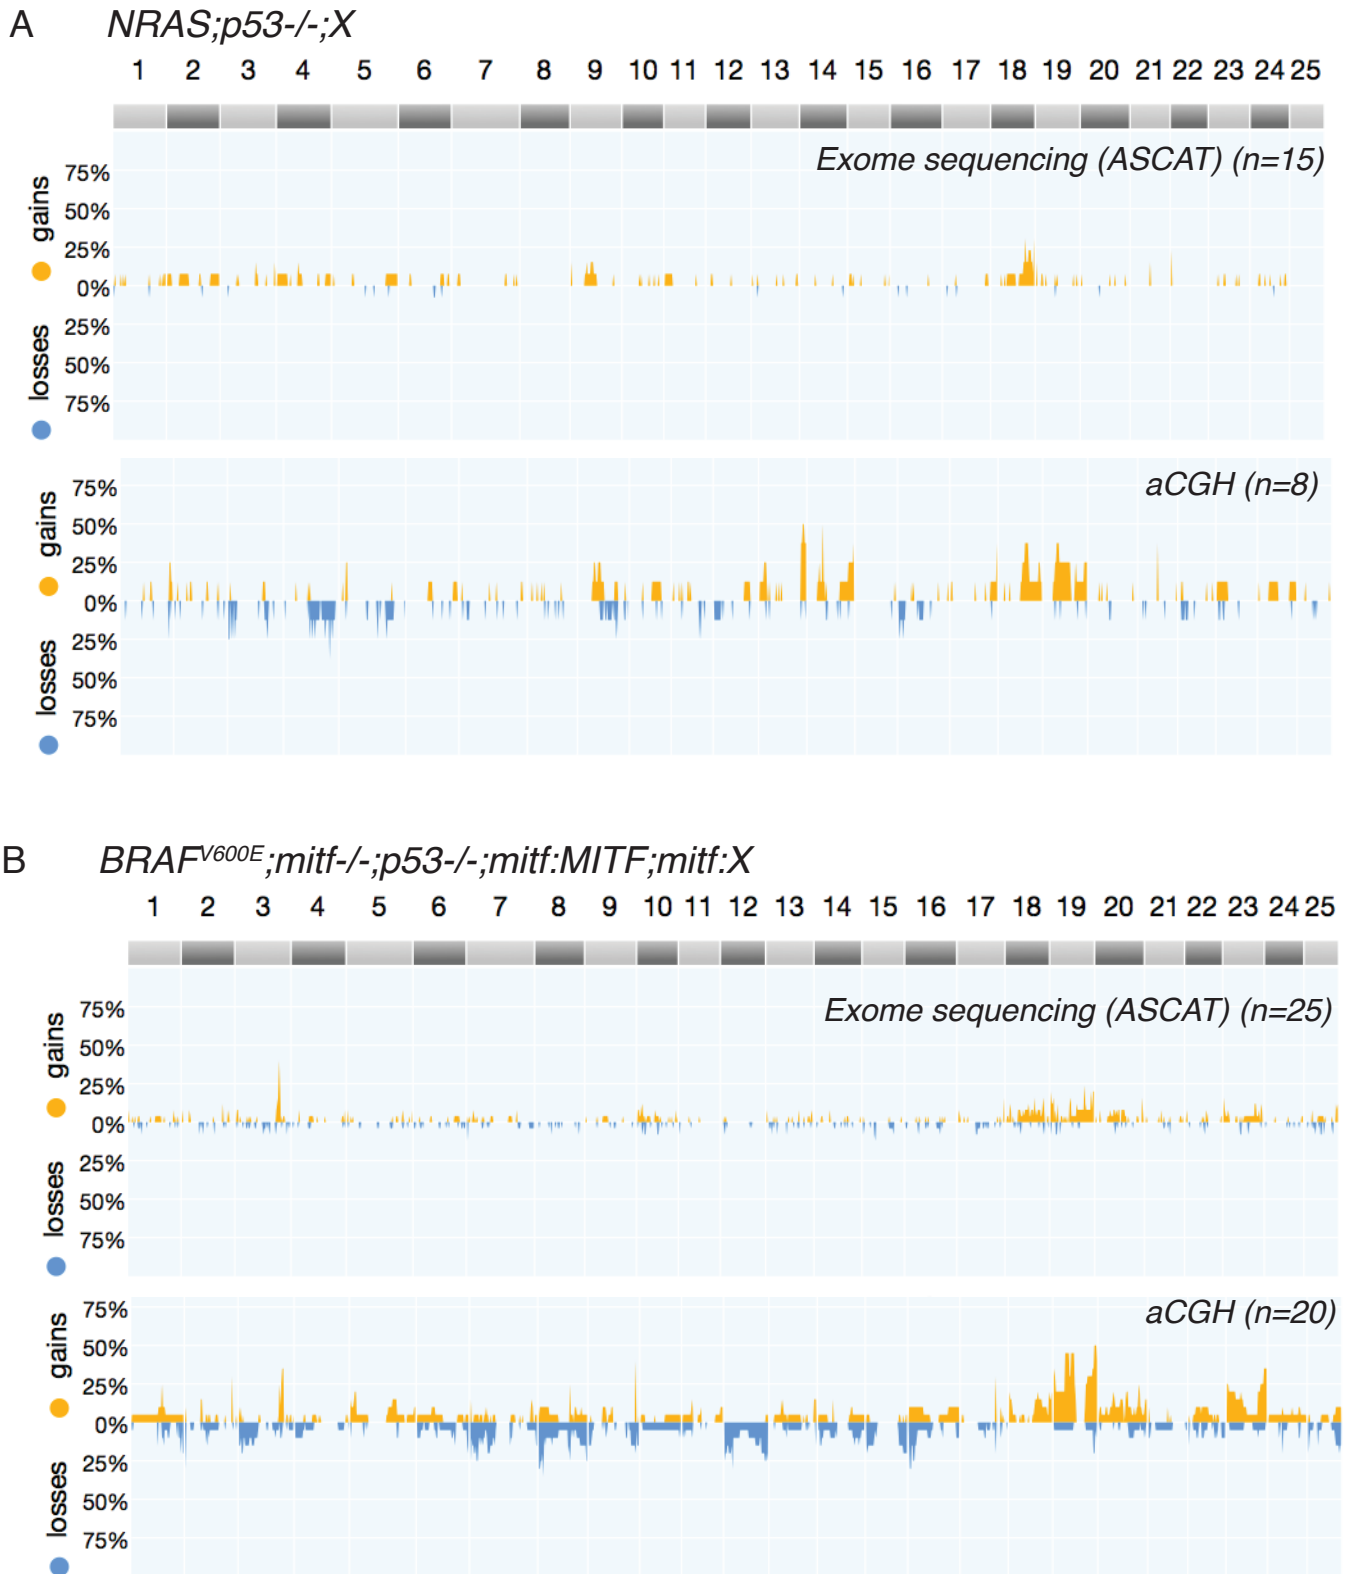

Figure S6

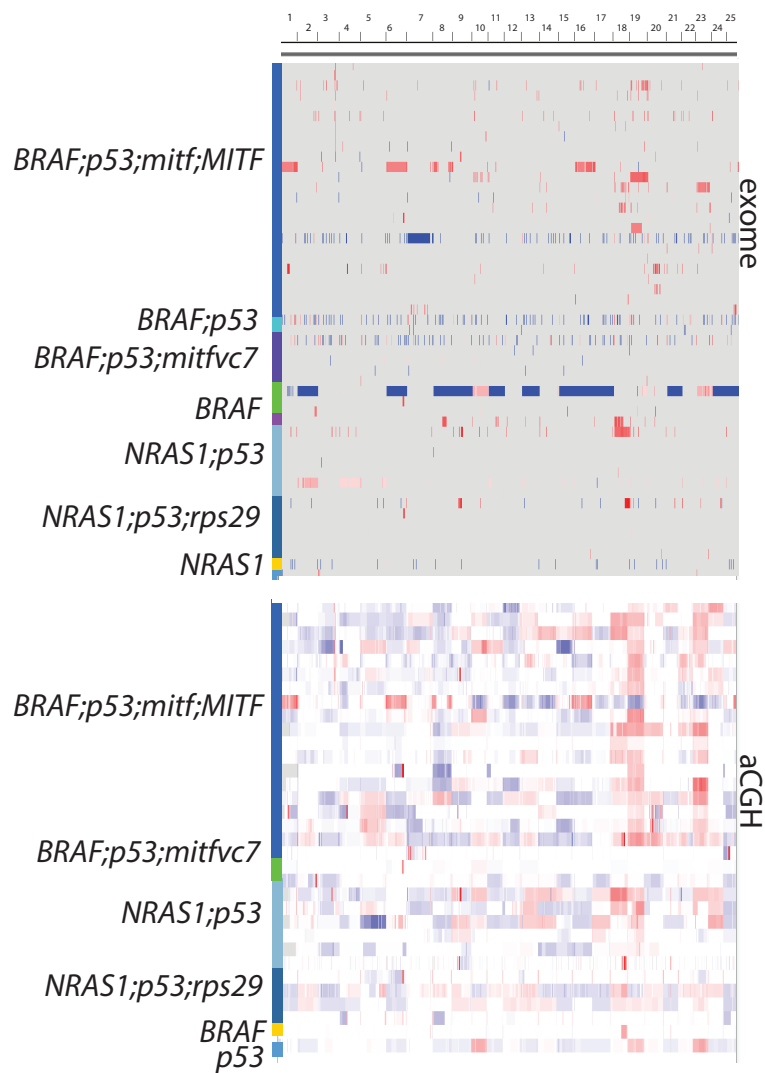

Figure S7

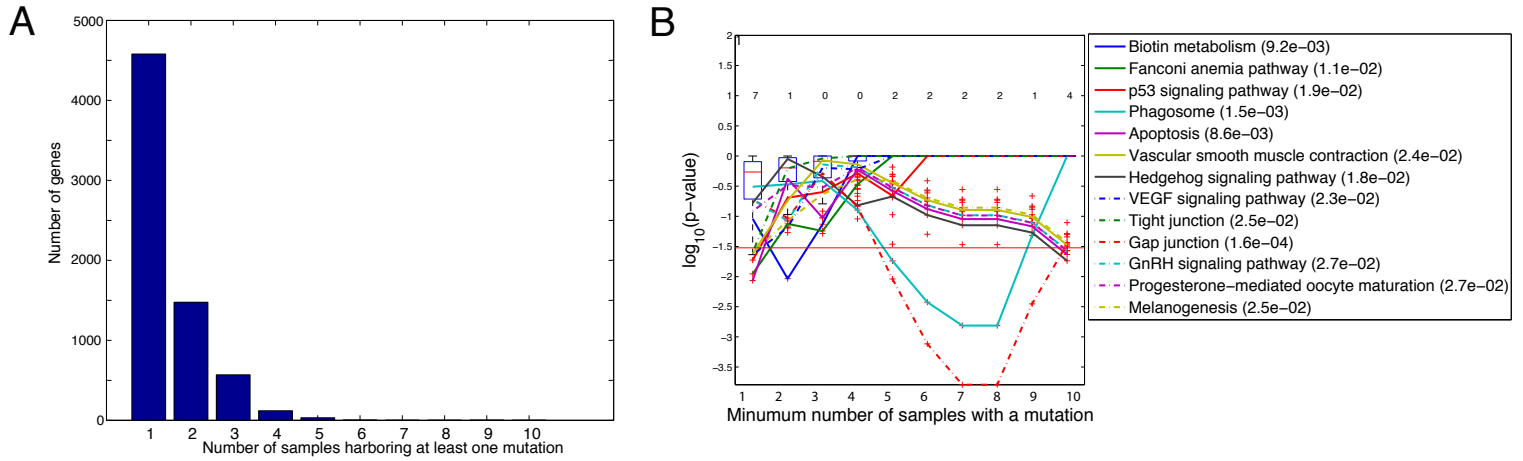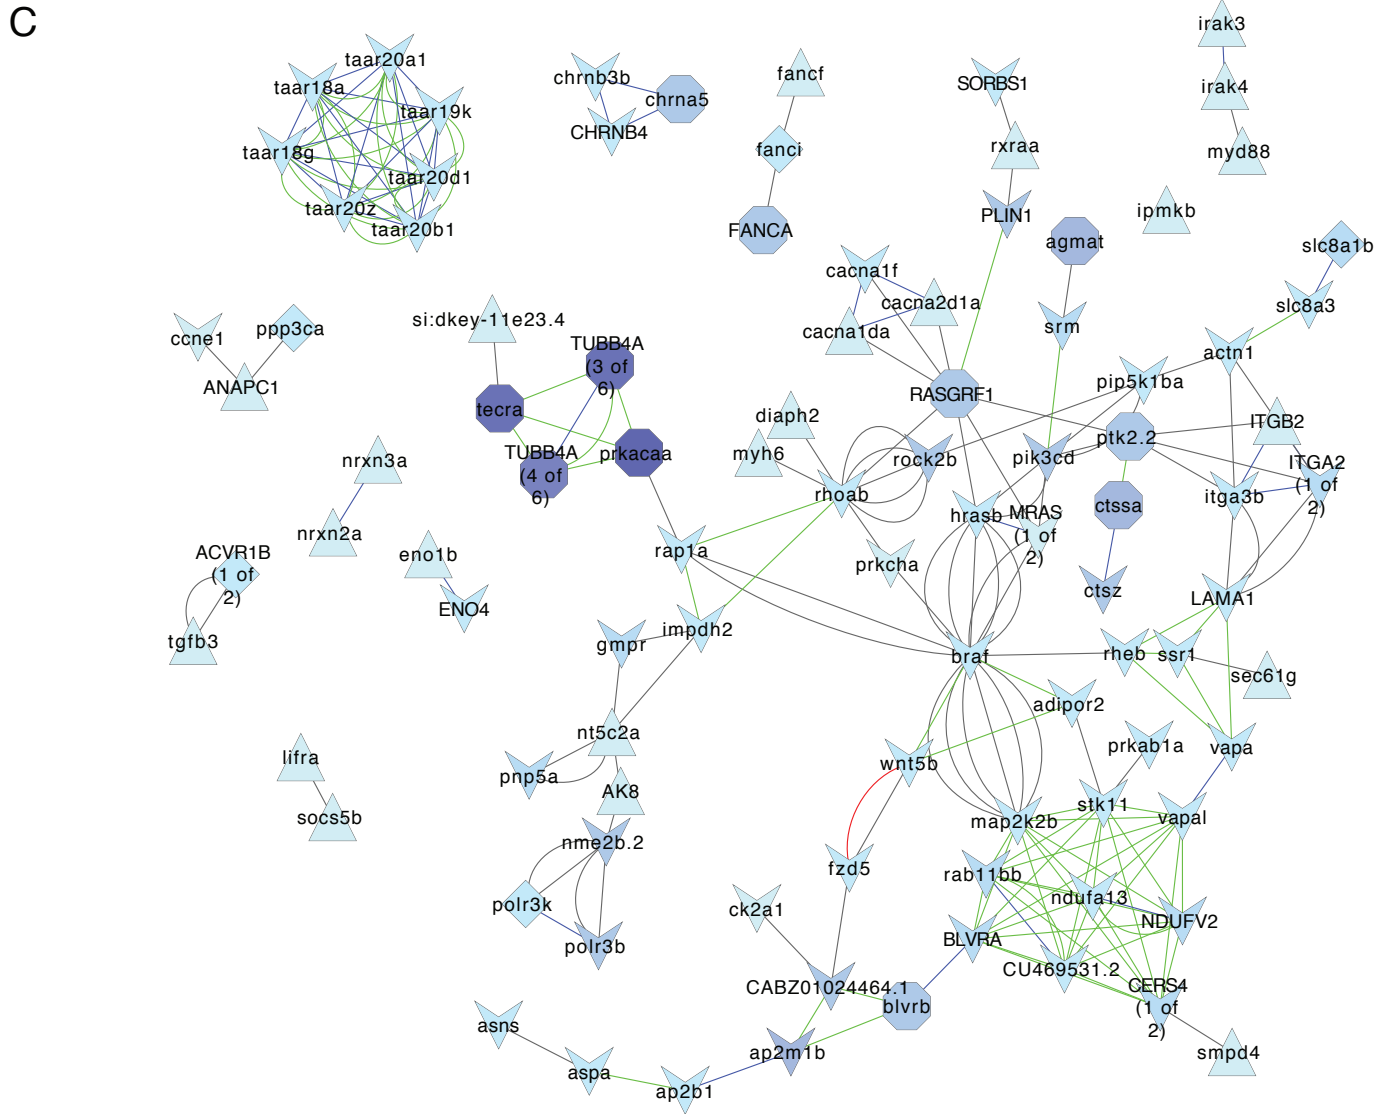

Figure S8

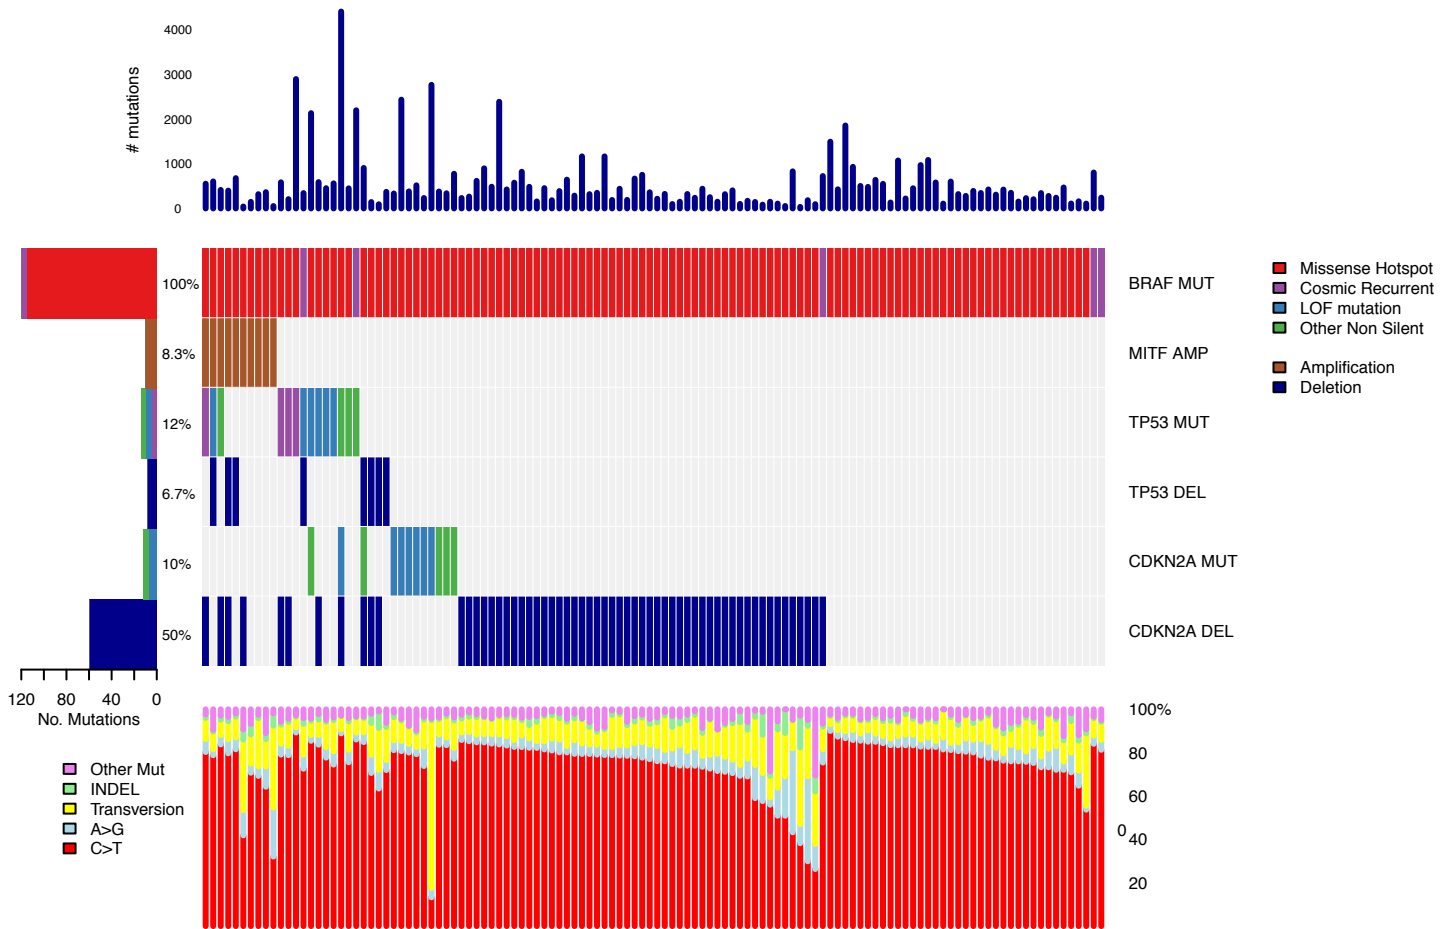

Supplement: gb-2013-14-10-r113-S2.pdf [file gb-2013-14-10-r113-S2.pdf]
